# Supplementary material
Source: MDPI journal article supplement (https://www.mdpi.com/2073-8994/13/7/1119)
Supplement: s1 [file s1]

## Supporting information for

# Encapsulation of small organic molecules for affecting symmetry of supramolecular crystals

Pavel V. Nesterov <sup>1</sup>, Vladimir V. Shilovskikh <sup>1</sup>, Alexander D. Sokolov <sup>1</sup>, Vladislav V. Gurzhiy <sup>2</sup>, Alexander S. Novikov <sup>1</sup>, Alexandra A. Timralieva <sup>1</sup>, Elena V. Belogub <sup>3</sup>, Nikolay D. Kondratyuk <sup>4,5</sup>, Nikita D. Orekhov <sup>4,5,6</sup> and Ekaterina V. Skorb <sup>1,\*</sup>

1. Infochemistry Scientific Center of ITMO University, Lomonosova str. 9, St. Petersburg 191002, Russian Federation

2. Crystallography Department, Institute of Earth Sciences, Saint-Petersburg State University, 199034, University emb. 7/9, Saint-Petersburg, Russian Federation

3. South Urals Federal Research Center of Mineralogy and Geoecology, Urals Branch of Russian Academy of Science, Miass, 456317, Russia

4. Joint Institute for High Temperatures of the Russian Academy of Sciences, 13 Izhorskaya Bd 2, Moscow, Russian Federation

5. Moscow Institute of Physics and Technology, 9 Institutskiy per., Dolgoprudny, Moscow Region, Russian Federation

6. Bauman Moscow State Technical University, 2nd Baumanskaya Str., 5, Moscow, Russia

\*Correspondence: skorb@itmo.ru

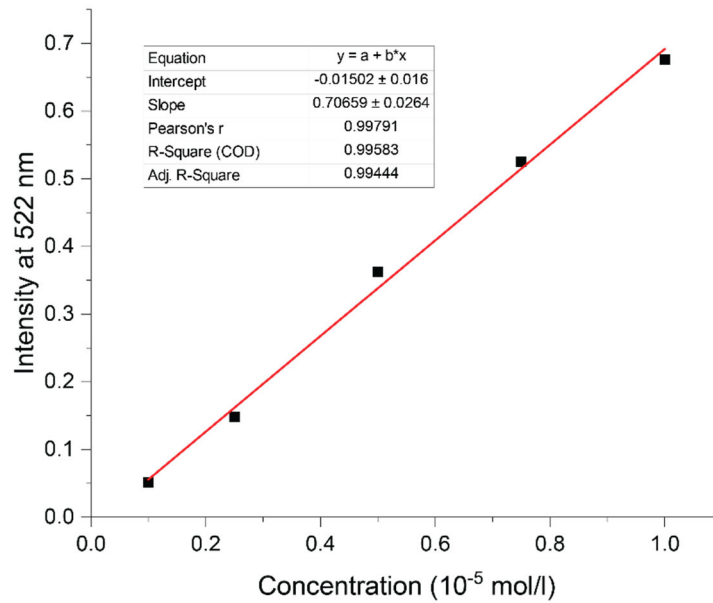

**Figure S1.** Calibration curve for M-BA crystals dissolved in NaOH solution.

**Figure S2.** UV-vis spectra for solution obtained from dissolved M-BA crystals with (red curve) and without Rh6G inside the crystal. Prior to the dissolution the crystals were placed inside Rh6G solution with given concentrations:  $10^{-7}$ ,  $10^{-6}$ ,  $10^{-5}$  (black, blue and red curves respectively) and after that washed in distilled water.

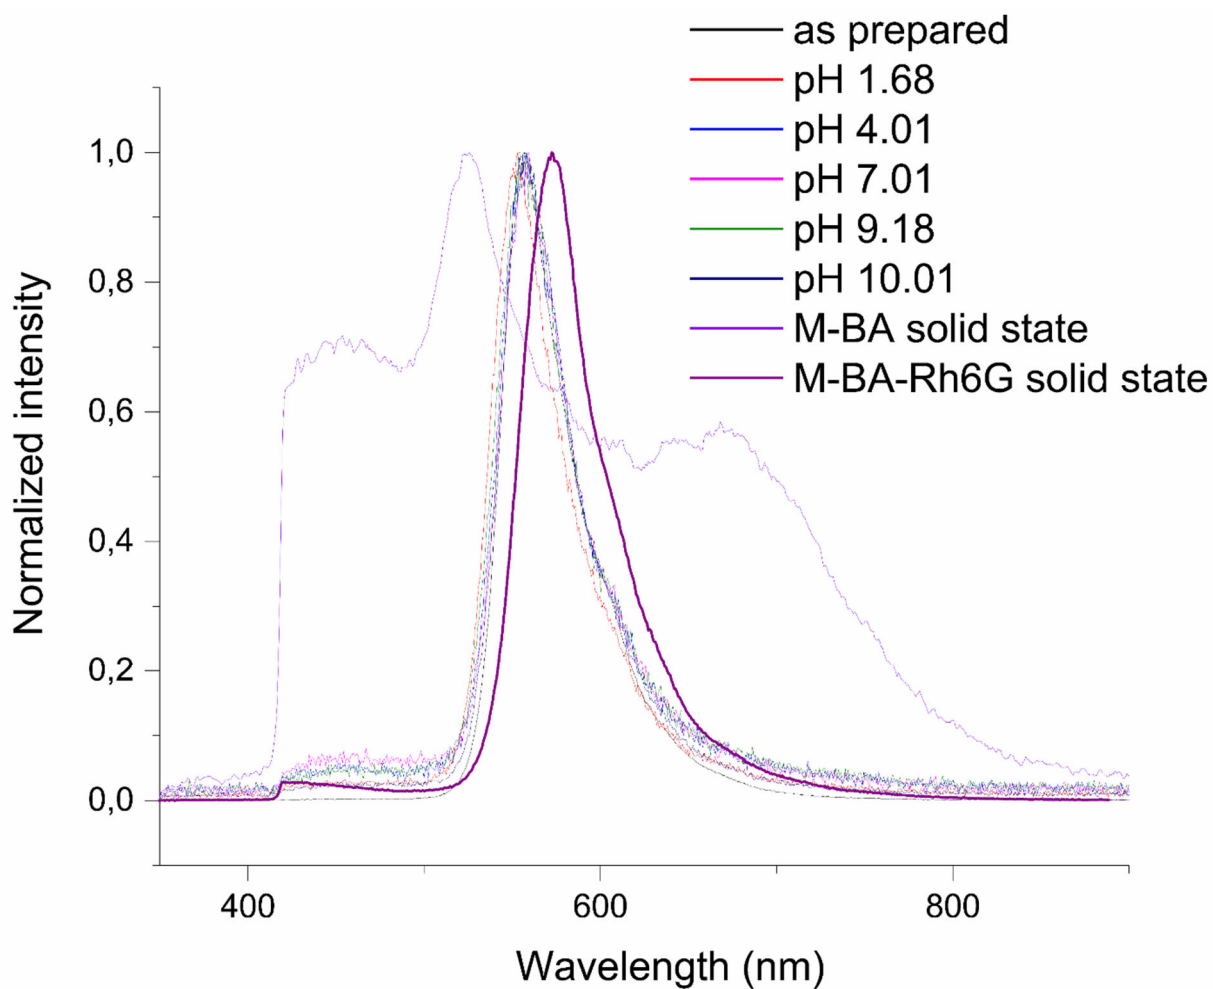

**Figure S3.** Luminescence spectra of Rh6G solutions at different pH and luminescence spectra of solid state M-BA and M-BA-Rh6G

**Table S1.** Crystallinity data for M-BA and M-BA-Rh6G crystals

| Rh6G Concentration,<br>mol/l | Crystallinity | Crystal $I_{cr}$ | Amorphous |
|------------------------------|---------------|------------------|-----------|
| 0                            | 89.87         | 16.11            | 1.82      |
| $10^{-7}$                    | 82.91         | 13.53            | 2.79      |
| $10^{-6}$                    | 89.09         | 15.79            | 1.93      |
| $10^{-5}$                    | 84.35         | 15.78            | 2.93      |
| $10^{-4}$                    | 85.88         | 16.95            | 2.79      |

**Table S2.** Crystallographic data for M-Ba.

|                                                   |                    |
|---------------------------------------------------|--------------------|
| Crystal System                                    | Orthorhombic       |
| Space group                                       | <i>Ccc2</i>        |
| <i>a</i> (Å)                                      | 5.0575(4)          |
| <i>b</i> (Å)                                      | 12.1663(9)         |
| <i>c</i> (Å)                                      | 15.7377(11)        |
| <i>V</i> (Å <sup>3</sup> )                        | 968.36(12)         |
| Molecular weight                                  | 254.23             |
| $\mu$ (mm <sup>-1</sup> )                         | 1.211              |
| Temperature (K)                                   | 100(2)             |
| <i>Z</i>                                          | 4                  |
| <i>D</i> <sub>calc</sub> (g/cm <sup>3</sup> )     | 1.744              |
| Crystal size (mm <sup>3</sup> )                   | 0.05 × 0.03 × 0.01 |
| Radiation                                         | CuK $\alpha$       |
| Total reflections                                 | 2461               |
| Unique reflections                                | 843                |
| Angle range 2 $\theta$ (°)                        | 11.24–140.00       |
| Reflections with $ F_o  \geq 4\sigma_F$           | 801                |
| <i>R</i> <sub>int</sub>                           | 0.0259             |
| <i>R</i> <sub><math>\sigma</math></sub>           | 0.0259             |
| <i>R</i> <sub>1</sub> ( $ F_o  \geq 4\sigma_F$ )  | 0.0303             |
| <i>wR</i> <sub>2</sub> ( $ F_o  \geq 4\sigma_F$ ) | 0.0788             |
| <i>R</i> <sub>1</sub> (all data)                  | 0.0327             |
| <i>wR</i> <sub>2</sub> (all data)                 | 0.0834             |
| <i>S</i>                                          | 1.104              |
| $\rho_{\min}, \rho_{\max}, e/\text{\AA}^3$        | −0.192, 0.191      |
| CSD                                               | 2087674            |

$R_1 = \Sigma||F_o| - |F_c||/\Sigma|F_o|$ ;  $wR_2 = \{\Sigma[w(F_o^2 - F_c^2)^2]/\Sigma[w(F_o^2)^2]\}^{1/2}$ ;  $w = 1/[\sigma^2(F_o^2) + (aP)^2 + bP]$ , where  $P = (F_o^2 + 2F_c^2)/3$ ;  $s = \{\Sigma[w(F_o^2 - F_c^2)]/(n - p)\}^{1/2}$  where  $n$  is the number of reflections and  $p$  is the number of refinement parameters.
